# Supplementary material for: Quality of life outcomes in children after surgery for Hirschsprung disease and anorectal malformations: a systematic review and meta-analysis
Source: HighWire-hosted journal article supplement (doi:10.1136/wjps-2022-000447), 2022-11-01
Supplement: wjps-2022-000447supp001_data_supplement.pdf [file wjps-2022-000447supp001_data_supplement.pdf]

## Supplementary File 1

### MEDLINE

1. exp Hirschsprung Disease/ or (hirschsprung\* or hirschprung\* or hirsprung\* or congenital megacolon or aganglionic megacolon or intestinal aganglionosis or colonic aganglionosis or (rectosigmoid adj2 aganglionosis)).ti,ab,kf.
2. Anorectal Malformations/ or (anorectal malformation\* or anorectal anomal\* or anorectal Atresia\* or anal atresia\* or anorectal stenosis\* or imperforate anus).ti,ab,kf.
3. Fecal Incontinence/ or Constipation/ or Defecation/ or Flatulence/ or Diarrhea/ or ((faecal or fecal or feces or faeces or defaecat\* or defecat\* or stool\*) adj2 (problem\* or symptom\* or function\* or incontinen\* or continen\* or control\* or stain\* or urgen\* or soil\* or leak\*)).ti,ab,kf. or (diarrhoea or diarrhea or constipate\* or flatu\* or diaper\* or (stool\* adj2 (foul or smell or frequen\*))).ti,ab,kf.
4. (Baylor Continence Scale or Baylor Social Continence Scale or BCS or HAQL or Holschneider or FII or Kelly score or LSQ or Langemeijer Stool Questionnaire or family impact questionnaire).ti,ab,kf.
5. "Quality of Life"/ or "Outcome Assessment (Health Care)"/ or exp Patient Satisfaction/ or (qol or (quality adj2 life) or patient reported or prom).ti,ab,kf. or questionnaire\*.mp. or (well being or wellbeing or satisfaction or quality of life or physical function\* or appearance or body image or psychological or sexual or mental or social or psychosocial).ti,ab,kf.
6. (CBCL or CBCL\* or Child Behaviour Checklist or CHQ-PF50 or EuroQoL or FIL or HAQL or HOPES or Hunter Opinions Personal Expectations Scale or mos or pedsq1 or qqvcfa or SF36 or sf-36 or ssp or tacqol or TAIQOL).ti,ab,kf.
7. (1 or 2) and (3 or 4) and (5 or 6) and (infant\* or child\* or adolescences\*).mp.
8. limit 7 to (english language and yr="2007 - 2020" and journal article)

### Embase

1. exp Hirschsprung Disease/ or (hirschsprung\* or hirschprung\* or Hirsprung\* or congenital megacolon or aganglionic megacolon or intestinal aganglionosis or colonic aganglionosis or (rectosigmoid adj2 aganglionosis)).ti,ab,kw.
2. exp Anorectal Malformation/ or (anorectal malformation\* or anorectal anomal\* or anorectal Atresia\* or anal atresia\* or anorectal stenosis\* or imperforate anus).ti,ab,kw.
3. Feces Incontinence/ or exp Constipation/ or Defecation/ or Defecation Disorder/ or Flatulence/ or exp Diarrhea/ or ((faecal or fecal or feces or faeces or defaecat\* or defecat\* or stool\*) adj2 (problem\* or symptom\* or function\* or incontinen\* or continen\* or control\* or stain\* or urgen\* or soil\* or leak\*)).ti,ab,kw. or (diarrhoea or diarrhea or constipate\* or flatu\* or diaper\* or (stool\* adj2 (foul or smell or frequen\*))).ti,ab,kw.

4. (Baylor Continence Scale or Baylor Social Continence Scale or BCS or HAQL or Holschneider or FII or Kelly score or LSQ or Langemeijer Stool Questionnaire or family impact questionnaire).ti,ab,kw.

5. \*"Quality of Life"/ or \*Outcome assessment/ or \*Patient attitude/ or \*Satisfaction/ or exp \*Patient Satisfaction/ or (qol or (quality adj2 life) or patient reported or prom).tw. or questionnaire\*.mp. or (well being or wellbeing or satisfaction or quality of life or physical function\* or appearance or body image or psychological or sexual or mental or social or psychosocial).ti,ab,kw.

6. (CBCL or CBCL\* or Child Behaviour Checklist or CHQ-PF50 or EuroQoL or FIL or HAQL or HOPES or Hunter Opinions Personal Expectations Scale or mos or pedsqI or qqvcfca or SF36 or sf-36 or ssp or tacqol or TAIQOL).ti,ab,kw.

7. (1 or 2) and (3 or 4) and (5 or 6) and (baby\* or babies\* or newborn\* or infan\* or neonat\* or preschool\* or pre-school\* or child\* or pediater\* or paediatr\* or teen\* or adolescen\*).mp.

8. limit 7 to (Embase)

9. limit 8 to conference abstract

10. 8 not 9

11. limit 10 to (english language and yr="2007 - 2020")

#### **Cochrane Central Trials Registry (CENTRAL)**

1. (hirschsprung\* or hirschprung\* or Hirschprung\* or congenital megacolon or aganglionic megacolon or intestinal aganglionosis or colonic aganglionosis or (rectosigmoid adj2 aganglionosis)).ti,ab,kw.

2. (anorectal malformation\* or anorectal anomal\* or anorectal Atresia\* or anal atresia\* or anorectal stenosis\* or imperforate anus).ti,ab,kw.

3. (((faecal or fecal or feces or faeces or defaecat\* or defecat\* or stool\*) adj2 (problem\* or symptom\* or function\* or incontinen\* or continen\* or control\* or stain\* or urgen\* or soil\* or leak\*)) or (diarrhoea or diarrhea or constipate\* or flatu\* or diaper\* or (stool\* adj2 (foul or smell or frequen\*))))).ti,ab,kw.

4. (Baylor Continence Scale or Baylor Social Continence Scale or BCS or HAQL or Holschneider or FII or Kelly score or LSQ or Langemeijer Stool Questionnaire or family impact questionnaire).ti,ab,kw.

5. (qol or (quality adj2 life) or patient reported or prom).tw. or questionnaire\*.mp. or (well being or wellbeing or satisfaction or quality of life or physical function\* or appearance or body image or psychological or sexual or mental or social or psychosocial).ti,ab,kw.

6. (CBCL or CBCL\* or Child Behaviour Checklist or CHQ-PF50 or EuroQoL or FIL or HAQL or HOPES or Hunter Opinions Personal Expectations Scale or mos or pedsqI or qqvcfca or SF36 or sf-36 or ssp or tacqol or TAIQOL).ti,ab,kw.

7. (1 or 2) and (3 or 4) and (5 or 6) and (baby\* or babies\* or newborn\* or infan\* or neonat\* or preschool\* or pre-school\* or child\* or pediater\* or paediatric\* or teen\* or adolescent\*).mp.

8. limit 7 to yr="2007 - 2020"
