# Supplementary material for: Quality of life outcomes in children after surgery for Hirschsprung disease and anorectal malformations: a systematic review and meta-analysis
Source: HighWire-hosted journal article supplement (doi:10.1136/wjps-2022-000447), 2022-11-01
Supplement: wjps-2022-000447supp002_data_supplement.pdf [file wjps-2022-000447supp002_data_supplement.pdf]

**Supplementary File 2**

Table S1. Description of Quality-of-Life Instrument used and Scoring Threshold (if appropriate) per Included Study

| Author, year | Constipation                                                                                                                                                         | Small bowel obstruction | Fecal Incontinence                                                                                                                                                   | Difficulty defecating | Enterocolitis                        | Psychosocial problems                                                                             |
|--------------|----------------------------------------------------------------------------------------------------------------------------------------------------------------------|-------------------------|----------------------------------------------------------------------------------------------------------------------------------------------------------------------|-----------------------|--------------------------------------|---------------------------------------------------------------------------------------------------|
| John, 2010   |                                                                                                                                                                      |                         | Quality of life (QOL) questionnaire<br>The scale used ranged from 0-13 with a higher score meaning a better QOL                                                      |                       |                                      |                                                                                                   |
| Grano, 2010  | Hirschsprung/Anorectal Malformation<br>Quality of life Questionnaire (HAQL)<br>Scores range from 0 to 100 with higher scores indicating higher levels of functioning |                         | Hirschsprung/Anorectal Malformation<br>Quality of life Questionnaire (HAQL)<br>Scores range from 0 to 100 with higher scores indicating higher levels of functioning |                       |                                      | Hirschsprung/Anorectal Malformation<br>Quality of life Questionnaire (HAQL)<br>Mean scores given. |
| Yang, 2016   |                                                                                                                                                                      |                         | Detailed questionnaire (unspecified)                                                                                                                                 |                       | Detailed questionnaire (unspecified) |                                                                                                   |

|                |                                                                                                                                                                                                                 | Proportions given.                                                                       | Proprtions given.                                                                         |
|----------------|-----------------------------------------------------------------------------------------------------------------------------------------------------------------------------------------------------------------|------------------------------------------------------------------------------------------|-------------------------------------------------------------------------------------------|
| Yeh, 2014      |                                                                                                                                                                                                                 | Medical records and standardized telephone questionnaire (unspecified) Proportions given | Medical records and standardized telephone questionnaire (unspecified) Proportions given. |
| Yamataka, 2009 | Continence evaluation questionnaire. Questionnaire used and values for score given is % of patients, higher % is more patients experienced symptom. Postoperative constipation did not occur in surgery groups. |                                                                                          |                                                                                           |
| Wang, 2014     |                                                                                                                                                                                                                 |                                                                                          | Questionnaire (undefined)                                                                 |

|                 |                                                                                                                                                     |                                                                                                                               |                                                                                                                 |                                                                                                                                                                                                                                                                                      |
|-----------------|-----------------------------------------------------------------------------------------------------------------------------------------------------|-------------------------------------------------------------------------------------------------------------------------------|-----------------------------------------------------------------------------------------------------------------|--------------------------------------------------------------------------------------------------------------------------------------------------------------------------------------------------------------------------------------------------------------------------------------|
| Granstrom, 2013 | Patient records<br>Proportions<br>given, no scores                                                                                                  | Patient records<br>Proportions<br>given                                                                                       |                                                                                                                 |                                                                                                                                                                                                                                                                                      |
| Hukkinen, 2014  |                                                                                                                                                     | Bowel function<br>score<br>questionnaire.<br>Proportions<br>given. Bowel<br>obstruction =<br>acute intestinal<br>obstruction. |                                                                                                                 | Bowel function<br>score<br>questionnaire.<br>Proportions<br>given.                                                                                                                                                                                                                   |
| Roorda, 2018    | Hirschsprung/<br>Anorectal<br>Malformation<br>Quality of life<br>Questionnaire<br>(HAQL disease<br>specific QoL)<br>Proportions<br>given, no scores |                                                                                                                               | Hirschsprung/<br>Anorectal<br>Malformation<br>Quality of life<br>Questionnaire<br>(HAQL).<br>Proportions given. | CHQ-PF50 and<br>CHQ-CF87.<br>Mean scores given.<br>Scales range from<br>0-100 with higher<br>scores indicating<br>better perceived<br>functioning. When<br>parent and self-<br>report yielded the<br>same domain score,<br>these were pooled<br>and compared with<br>normative data. |

|              |                                                                                                                                                                                     |                                                                                                                           |                                                                               |                                                                                                                                                                                                              |
|--------------|-------------------------------------------------------------------------------------------------------------------------------------------------------------------------------------|---------------------------------------------------------------------------------------------------------------------------|-------------------------------------------------------------------------------|--------------------------------------------------------------------------------------------------------------------------------------------------------------------------------------------------------------|
| Levitt, 2013 | Medical/patient records and telephone/email questionnaire. Proportions given.                                                                                                       |                                                                                                                           | Medical/Patient Records and telephone/email questionnaire. Proportions given. |                                                                                                                                                                                                              |
| Sood, 2018   | Cleveland Clinic Constipation Scoring System (CCCSS) Higher scores indicate severe constipation and a global score of 15+ means patient has constipation. 30 = severe constipation. | Baylor Continence Scale. (BCS). BCS scores range from 2 to 92, where better social continence is denoted by lower scores. | REDCap colorectal database. Proportions given.                                | Hirschsprung/ Anorectal Malformation Quality of life Questionnaire (HAQL). Mean scores given. No SD reported for control data.                                                                               |
| Khalil, 2015 | Peds QL 4.0-Core Measurement Scale. Proportions given                                                                                                                               | Peds QL 4.0-Generic Core Scales. Proportions given.                                                                       |                                                                               | PedsQL 4.0 Core Measurement Model. Mean scores given. A 5-point Likert scale from 0 (never) to 4 (almost always) is used. Items are then reverse scored and linearly transformed to a 0 to 100 scale. Higher |

|              |                                                                                                                                                                                                                                                                                                                                                                       |                            |                            |                             |
|--------------|-----------------------------------------------------------------------------------------------------------------------------------------------------------------------------------------------------------------------------------------------------------------------------------------------------------------------------------------------------------------------|----------------------------|----------------------------|-----------------------------|
|              |                                                                                                                                                                                                                                                                                                                                                                       |                            |                            | scores indicate better QoL. |
| Meinds, 2019 | Rome IV. Proportions given, no scores. Constipation was defined by the Rome IV criteria for functional constipation. Patients need at least 2 of the following: straining, hard or lumpy stools, incomplete evacuation, anorectal obstruction, use of manual manoeuvres to defecate, or fewer than 3 bowel movements per week. Loose stools should rarely be present. | Rome IV. Proportions given | Rome IV. Proportions given |                             |

|               |                                                                                                                                                                                                                                |                                                                                                                                                                                                              |
|---------------|--------------------------------------------------------------------------------------------------------------------------------------------------------------------------------------------------------------------------------|--------------------------------------------------------------------------------------------------------------------------------------------------------------------------------------------------------------|
| Mathias, 2016 | Quality of life related to fecal continence in children and adolescents (QQVCFCA). The final score is obtained by summing the mean score obtained in each domain, and ranges from 4 to 16. High scores indicate good standing. |                                                                                                                                                                                                              |
| Lane, 2016    | Baylor Continence Scale (BCS). Scores range from 2 to 92, with lower scores reflecting better fecal continence/control.                                                                                                        | PedsQL Pediatric Quality of Life Inventory. Total parent reported HRQoL scores, and psychosocial scores were the sum of emotional, social and school functioning combined. Maximum score of 100, with higher |

|                |                                                                                                                                                                                     |                                                                                                                                                                                                             |                                                                                                    |
|----------------|-------------------------------------------------------------------------------------------------------------------------------------------------------------------------------------|-------------------------------------------------------------------------------------------------------------------------------------------------------------------------------------------------------------|----------------------------------------------------------------------------------------------------|
|                |                                                                                                                                                                                     |                                                                                                                                                                                                             | score corresponding to better QoL                                                                  |
| Collins, 2017  | Cleveland Clinic Constipation Scoring System (CCCSS). A score of 0 indicates normal bowel function, 15 is defined as “constipation”, and 30 indicates “severe constipation”.        | Baylor Continence Scale (BCS). Scores range from 2 to 92, with lower scores reflecting better fecal continence/control.                                                                                     | PedsQL 4.0 Generic Core Scale. Maximum score of 100, with higher score corresponding to better QoL |
| Aworanti, 2012 | Pediatric Incontinence and Constipation Scoring System questionnaire (PICSS). Mean scores presented. The maximum score is 29 for constipation (higher score means no constipation). | Pediatric Incontinence and Constipation Scoring System (PICSS). Mean scores presented. Maximum score is 32 for incontinence scale, which implies continence (closer the score is to 32 = better continence) |                                                                                                    |

|              |                                                                                                                                                                                     |                                                                                                                                                                                                                                |                                                                                                                 |                                                                                                                                                                                                |
|--------------|-------------------------------------------------------------------------------------------------------------------------------------------------------------------------------------|--------------------------------------------------------------------------------------------------------------------------------------------------------------------------------------------------------------------------------|-----------------------------------------------------------------------------------------------------------------|------------------------------------------------------------------------------------------------------------------------------------------------------------------------------------------------|
| Allin, 2020  | Pediatric Incontinence and Constipation Scoring System (PICSS) questionnaire. Mean scores presented. The maximum score is 29 for constipation (higher score means no constipation). | Pediatric Incontinence and Constipation Scoring System (PICSS). Mean scores presented. Maximum score is 32 for incontinence scale, which implies continence (closer the score is to 32 = better continence)                    | Pediatric Incontinence and Constipation Scoring System (PICSS). Proportions given.                              | PedsQL. Items are reverse scored and linearly transformed from 0 to 100. Higher scores indicate better quality of life.                                                                        |
| Espeso, 2020 |                                                                                                                                                                                     | Hirschsprung/ Anorectal Malformation Quality of life Questionnaire (HAQL). Mean scores given. Each dimension is scored over 100; the higher the score, the better quality of life. From 0-8 years, parents completed the HAQL. | Medical records. Proportions given. Two children aged 6-11 years experienced enterocolitis versus 0 aged 12-18. | Hirschsprung/ Anorectal Malformation Quality of life Questionnaire (HAQL). Mean scores given. Each dimension is scored over 100. The higher the overall score, the better the quality of life. |



|               |                                                                                                                                                                                                                                       |                                                                                                                                                                                                                             |                                                                                                                                                                                                                                                                                                            |
|---------------|---------------------------------------------------------------------------------------------------------------------------------------------------------------------------------------------------------------------------------------|-----------------------------------------------------------------------------------------------------------------------------------------------------------------------------------------------------------------------------|------------------------------------------------------------------------------------------------------------------------------------------------------------------------------------------------------------------------------------------------------------------------------------------------------------|
| Saysoo, 2020  | Hirschsprung/<br>Anorectal<br>Malformation<br>Quality of life<br>Questionnaire<br>(HAQL-<br>different).<br>A score from 0<br>to 3 was given in<br>response for<br>each item and a<br>better QoL was<br>indicated by a<br>higher score | Hirschsprung/<br>Anorectal<br>Malformation<br>Quality of life<br>Questionnaire<br>(HAQL).<br>A score from 0 to 3<br>was given in<br>response to each<br>item and a better<br>QoL was indicated<br>by a higher score.        | Hirschsprung/<br>Anorectal<br>Malformation<br>Quality of life<br>Questionnaire<br>(HAQL/modified).<br>Mean scores are not<br>differentiated by<br>parent vs adolescent<br>report. A score from<br>0 to 3 was given in<br>response for each<br>item and a better<br>QoL was indicated<br>by a higher score. |
| Townley, 2020 | The Paediatric<br>Incontinence and<br>Constipation<br>Score (PICS).<br>Data are given<br>as mean (range).<br>Scores range<br>from 0-29 with<br>higher scores<br>indicating no<br>constipation.                                        | Pediatric<br>Incontinence and<br>Constipation<br>Scoring System<br>(PICSS). Mean<br>scores (with SD or<br>range) given.<br>Maximum score is<br>32 for incontinence<br>scale, scores closer<br>to 32 = better<br>continence. |                                                                                                                                                                                                                                                                                                            |
| Wong, 2020    | Wong, 2020-A:<br>Hirschsprung/<br>Anorectal                                                                                                                                                                                           | Wong, 2020-A:<br>Hirschsprung/<br>Anorectal                                                                                                                                                                                 | Mean scores given.<br>For each item, the<br>patient was asked to                                                                                                                                                                                                                                           |

|                                                                                                                                                                                                                                                                                                                                                                                                                                                                                                                                                                                                            |  |                                                                                                                                                                                                                                                                                                                                                                                                                                                                                                                                                           |                                                                                                                                                                                                                                                                             |
|------------------------------------------------------------------------------------------------------------------------------------------------------------------------------------------------------------------------------------------------------------------------------------------------------------------------------------------------------------------------------------------------------------------------------------------------------------------------------------------------------------------------------------------------------------------------------------------------------------|--|-----------------------------------------------------------------------------------------------------------------------------------------------------------------------------------------------------------------------------------------------------------------------------------------------------------------------------------------------------------------------------------------------------------------------------------------------------------------------------------------------------------------------------------------------------------|-----------------------------------------------------------------------------------------------------------------------------------------------------------------------------------------------------------------------------------------------------------------------------|
| <p>Malformation<br/>Quality of life<br/>Questionnaire<br/>HAQL:<br/>Mean scores<br/>given. For each<br/>item, patient<br/>asked to indicate<br/>the frequency of<br/>occurrence using<br/>a 5-point scale<br/>from 1 (never) to<br/>5 (always).<br/>Responses<br/>recoded into a<br/>linear scale of 0-<br/>100. Higher<br/>scores indicate<br/>higher<br/>functioning.<br/>Wong, 2020-B:<br/>Krickenbeck<br/>classification<br/>(grade 2):<br/>Proportions<br/>given. The<br/>Krickenbeck<br/>classification<br/>(2005)<br/>categorizes<br/>constipation into<br/>3 types: grade 1<br/>(manageable by</p> |  | <p>Malformation<br/>Quality of life<br/>Questionnaire<br/>(HAQL).<br/><br/>Mean scores given.<br/>For each item,<br/>patient asked to<br/>indicate the<br/>frequency of<br/>occurrence using a<br/>5-point scale from<br/>1 (never) to 5<br/>(always).<br/>Responses were<br/>then recoded into a<br/>linear scale of 0-<br/>100. Higher scores<br/>indicate higher<br/>levels of<br/>functioning.<br/>Wong, 2020-B:<br/>Kelly's score of<br/>continence:<br/>Mean scores given.<br/>An overall score of<br/>5-6 is good, 3-4<br/>fair, and 0-2 poor.</p> | <p>indicate the<br/>frequency of<br/>occurrence using a<br/>5-point scale<br/>ranging from 1<br/>(never) to 5<br/>(always). The<br/>responses were<br/>recoded into a<br/>linear scale of 0-<br/>100. Higher scores<br/>indicated higher<br/>levels of<br/>functioning.</p> |
|------------------------------------------------------------------------------------------------------------------------------------------------------------------------------------------------------------------------------------------------------------------------------------------------------------------------------------------------------------------------------------------------------------------------------------------------------------------------------------------------------------------------------------------------------------------------------------------------------------|--|-----------------------------------------------------------------------------------------------------------------------------------------------------------------------------------------------------------------------------------------------------------------------------------------------------------------------------------------------------------------------------------------------------------------------------------------------------------------------------------------------------------------------------------------------------------|-----------------------------------------------------------------------------------------------------------------------------------------------------------------------------------------------------------------------------------------------------------------------------|

|  |                                                                                                                                                                 |                                                                                                                                                                                                                                                                                                                                                                    |                                                                                 |
|--|-----------------------------------------------------------------------------------------------------------------------------------------------------------------|--------------------------------------------------------------------------------------------------------------------------------------------------------------------------------------------------------------------------------------------------------------------------------------------------------------------------------------------------------------------|---------------------------------------------------------------------------------|
|  | changes in diet);<br>2 (requires<br>laxatives); and<br>3) resistant to<br>diet and<br>laxatives . Grade<br>2 is reported. No<br>case or control<br>had grade 3. | Zhuansun, 2020-<br>A: (Quality of Life)<br>QOL scoring<br>criteria for children<br>with fecal<br>incontinence:<br>Mean scores given.<br>Frequent is<br>assigned a 0.<br>Normal is assigned<br>a 2. Good = 9 to 12<br>points; fair = 5 to<br>8; poor = 0 to 4.<br>Zhuansun, 2020-B:<br>Mail<br>communications<br>and telephone<br>interviews:<br>Proportions given. | Mail<br>communications<br>and telephone<br>interviews.<br>Proportions<br>given. |
|--|-----------------------------------------------------------------------------------------------------------------------------------------------------------------|--------------------------------------------------------------------------------------------------------------------------------------------------------------------------------------------------------------------------------------------------------------------------------------------------------------------------------------------------------------------|---------------------------------------------------------------------------------|
