# Supplementary material for: Quality of life outcomes in children after surgery for Hirschsprung disease and anorectal malformations: a systematic review and meta-analysis
Source: HighWire-hosted journal article supplement (doi:10.1136/wjps-2022-000447), 2022-11-01
Supplement: wjps-2022-000447supp003_data_supplement.pdf [file wjps-2022-000447supp003_data_supplement.pdf]

| Author, year.<br>Location.          | Population<br>Studied and<br>Mean Age               | Constipation | Small Bowel<br>Obstruction | Fecal<br>incontinence | Enterocolitis | Social<br>functioning | Psychosocial<br>functioning | Emotional<br>functioning |
|-------------------------------------|-----------------------------------------------------|--------------|----------------------------|-----------------------|---------------|-----------------------|-----------------------------|--------------------------|
| <b>Cohort studies</b>               |                                                     |              |                            |                       |               |                       |                             |                          |
| <b>Khalil, 2015.<br/>Egypt.</b>     | 53 children with<br>a mean age of 5.8<br>years.     |              |                            |                       |               |                       |                             |                          |
| Parent report<br>(n/N) <sup>a</sup> |                                                     | 4/53         | <sup>b</sup>               | 3/53                  |               |                       |                             |                          |
| Parent report<br>(mean, SD)         |                                                     |              |                            |                       |               | 92.3 ± 14.7           |                             | 95.5 ± 6.5               |
| Child report<br>(n/N)               |                                                     |              |                            |                       |               |                       |                             |                          |
| Child report<br>(mean, SD)          |                                                     |              |                            |                       |               |                       |                             |                          |
| <b>Lane, 2016.<br/>USA.</b>         | 325 children and<br>youth younger<br>than 18 years. |              |                            |                       |               |                       |                             |                          |
| Parent report<br>(n/N)              |                                                     |              |                            |                       |               |                       |                             |                          |
| Parent report<br>(mean, SD)         |                                                     |              |                            | 23                    |               |                       | 58.9 ± 19.2                 |                          |
| Child report<br>(mean, SD)          |                                                     |              |                            |                       |               |                       |                             |                          |
| Child report<br>(mean, SD)          |                                                     |              |                            |                       |               |                       |                             |                          |

|                                     |                                                                                         |              |              |
|-------------------------------------|-----------------------------------------------------------------------------------------|--------------|--------------|
| <b>Grano, 2010.<br/>Italy.</b>      | 62 children with a mean age of 7.3 years and 175 parents with a mean age of 24.0 years. |              |              |
| Parent report<br>(n/N)              |                                                                                         |              |              |
| Parent report<br>(mean, SD)         | 81.98± 24.21                                                                            | 79.87± 20.49 | 85.68± 21.69 |
| Child report<br>(n/N)               |                                                                                         |              |              |
| Child report<br>(mean, SD)          |                                                                                         |              |              |
| <b>John, 2010.<br/>India.</b>       | 166 children with a mean age of 7.5 years.                                              |              |              |
| Parent report<br>(n/N)              |                                                                                         |              |              |
| Parent report<br>(mean, SD)         |                                                                                         | 9.1          |              |
| Child report<br>(n/N)               |                                                                                         |              |              |
| Child report<br>(mean, SD)          |                                                                                         |              |              |
| <b>Aworanti, 2012.<br/>Ireland.</b> | 51 parents whose mean age was not reported.                                             |              |              |
| Parent report<br>(n/N)              | 16/51                                                                                   | 31/42        |              |
| Parent report<br>(mean, SD)         |                                                                                         |              |              |

|                                         |                                                                                                   |       |       |
|-----------------------------------------|---------------------------------------------------------------------------------------------------|-------|-------|
| Child report<br>(n/N)                   |                                                                                                   |       |       |
| Child report<br>(mean, SD)              |                                                                                                   |       |       |
| <b>Granstrom,<br/>2013.<br/>Sweden.</b> | 27 children with<br>a mean age of 4.4<br>years at interview<br>1 and 7.4 years at<br>interview 2. |       |       |
| Parent report<br>(n/N)                  | 11/27                                                                                             | 20/27 |       |
| Parent report<br>(mean, SD)             |                                                                                                   |       |       |
| Child report<br>(n/N)                   |                                                                                                   |       |       |
| Child report<br>(mean, SD)              |                                                                                                   |       |       |
| <b>Yang, 2016.<br/>China.</b>           | 31 parents whose<br>mean age was not<br>reported.                                                 |       |       |
| Parent report<br>(n/N)                  |                                                                                                   | 0/31  | 21/31 |
| Parent report<br>(mean, SD)             |                                                                                                   |       |       |
| Child report<br>(n/N)                   |                                                                                                   |       |       |
| Child report<br>(mean, SD)              |                                                                                                   |       |       |
| <b>Levitt, 2013.<br/>USA.</b>           | 67 children with<br>a mean age of<br>1.56 years.                                                  |       |       |
| Parent report<br>(n/N)                  | 21/67                                                                                             |       | 9/67  |

|                                       |                                                   |  |      |
|---------------------------------------|---------------------------------------------------|--|------|
| Parent report<br>(mean, SD)           |                                                   |  |      |
| Child report<br>(n/N)                 |                                                   |  |      |
| Child report<br>(mean, SD)            |                                                   |  |      |
| <b>Hukkinen, 2014.<br/>Finland.</b>   | 8 children whose<br>mean age was not<br>reported. |  |      |
| Parent report<br>(n/N)                | 4/8                                               |  | 5/8  |
| Parent report<br>(mean, SD)           |                                                   |  |      |
| Child report<br>(n/N)                 |                                                   |  |      |
| Child report<br>(mean, SD)            |                                                   |  |      |
| <b>Yeh, 2014.<br/>Taiwan.</b>         | 9 children with a<br>mean age of 0.49<br>years.   |  |      |
| Parent report<br>(n/N)                | 4/9                                               |  | 5/9  |
| Parent report<br>(mean, SD)           |                                                   |  |      |
| Child report<br>(n/N)                 |                                                   |  |      |
| Child report<br>(mean, SD)            |                                                   |  |      |
| <b>Roorda, 2018.<br/>Netherlands.</b> |                                                   |  |      |
| Parent report<br>(n/N)                | 13/17                                             |  | 8/17 |

|                                         |                                                                  |        |        |           |
|-----------------------------------------|------------------------------------------------------------------|--------|--------|-----------|
| Parent report<br>(mean, SD)             |                                                                  |        |        | 95.6± 8.5 |
| Child report<br>(n/N)                   | 8/26                                                             | 8/17   |        |           |
| Child report<br>(mean, SD)              |                                                                  |        |        | 95.6± 8.5 |
| <b>Zhuansun, 2020.</b><br><b>China.</b> | 35 children whose mean age was not reported.                     |        |        |           |
| Parent report<br>(n/N)                  |                                                                  |        |        |           |
| Parent report<br>(mean, SD)             |                                                                  |        |        |           |
| Child report<br>(n/N)                   |                                                                  | 6/198  | 36/198 |           |
| Child report<br>(mean, SD)              |                                                                  |        |        |           |
| <b>Espeso, 2020.</b><br><b>France.</b>  | 63 child-parent dyads with a children's mean age of 11.55 years. |        |        |           |
| Parent report<br>(n/N)                  |                                                                  |        |        |           |
| Parent report<br>(mean, SD)             |                                                                  | 58± 36 | 88± 20 | 85± 20    |
| Child report<br>(n/N)                   |                                                                  |        | 2/63   |           |
| Child report<br>(mean, SD)              |                                                                  | 68± 32 | 94± 12 | 86± 26    |

|                                                 |                                                     |       |             |             |
|-------------------------------------------------|-----------------------------------------------------|-------|-------------|-------------|
| <b>Townley, 2020.</b><br><b>United Kingdom.</b> | 71 children<br>whose mean age<br>was not reported.  |       |             |             |
| Parent report<br>(n/N)                          |                                                     |       |             |             |
| Parent report<br>(mean, SD)                     | 17± 6                                               | 17± 7 |             |             |
| Child report<br>(n/N)                           |                                                     |       |             |             |
| Child report<br>(mean, SD)                      |                                                     |       |             |             |
| <b>Saysoo, 2020.</b><br><b>Indonesia.</b>       | 11 children<br>whose mean age<br>was not reported.  |       |             |             |
| Parent report<br>(n/N)                          |                                                     |       |             |             |
| Parent report<br>(mean, SD)                     | 2.5                                                 | 2.06  | 2.69± 0.99  |             |
| Child report<br>(n/N)                           |                                                     |       |             |             |
| Child report<br>(mean, SD)                      | 2.5                                                 | 2.06  | 2.69 ± 0.99 |             |
| <b>Allin, 2020.</b><br><b>United Kingdom.</b>   | 227 children<br>whose mean age<br>was not reported. |       |             |             |
| Parent report<br>(n/N)                          | 27/72                                               | 29/72 | 108/227     |             |
| Parent report<br>(mean, SD)                     |                                                     |       |             | 67.4± 20.96 |
| Child report<br>(n/N)                           |                                                     |       |             |             |

|                                             |                                               |             |  |           |
|---------------------------------------------|-----------------------------------------------|-------------|--|-----------|
| Child report<br>(mean, SD)                  |                                               |             |  |           |
| <b>Case Control Studies</b>                 |                                               |             |  |           |
| <b>Yamataka, 2009.</b><br><b>Japan.</b>     | 24 children whose mean age was .082 years.    |             |  |           |
| Parent report<br>(n/N)                      | 0/14                                          |             |  |           |
| Parent report<br>(mean, SD)                 |                                               |             |  |           |
| Child report<br>(n/N)                       |                                               |             |  |           |
| Child report<br>(mean, SD)                  |                                               |             |  |           |
| Control (n/N, %)                            |                                               |             |  |           |
| <b>Collins, 2017.</b><br><b>Australia.</b>  | 60 parents whose mean age was not reported.   |             |  |           |
| Parent report<br>(n/N)                      |                                               |             |  |           |
| Parent report<br>(mean, SD)                 | 4.47 ± 3.97                                   | 22.2 ± 13.3 |  | 76 ± 17.9 |
| Child report<br>(n/N)                       |                                               |             |  |           |
| Child report<br>(mean, SD)                  |                                               |             |  |           |
| Control (n/N, %)                            |                                               |             |  |           |
| <b>Meinds, 2019.</b><br><b>Netherlands.</b> | 173 children whose mean age was not reported. |             |  |           |
| Parent report<br>(n/N)                      |                                               |             |  |           |

|                                           |                                                   |        |            |       |              |
|-------------------------------------------|---------------------------------------------------|--------|------------|-------|--------------|
| Parent report<br>(mean, SD)               |                                                   |        |            |       |              |
| Child report<br>(n/N)                     | 38/173                                            | 39/173 | 65/173     |       |              |
| Child report<br>(mean, SD)                |                                                   |        |            |       |              |
| Control (n/N, %)                          |                                                   |        |            |       |              |
| <b>Wong<sup>c</sup>, 2020.<br/>China.</b> | 21 children with<br>a mean age of 18<br>years.    |        |            |       |              |
| Parent report<br>(n/N)                    |                                                   |        |            |       |              |
| Parent report<br>(mean, SD)               |                                                   |        |            |       |              |
| Child report<br>(n/N)                     |                                                   |        |            |       |              |
| Child report<br>(mean, SD)                | 42.9                                              |        | 77.2       | 26.4  | 71.9         |
| Control (n/N)                             |                                                   |        |            |       |              |
| Control<br>(mean,SD)                      | 60                                                |        | 87.5       | 71.7  | 63.6         |
| <b>Sood, 2018.<br/>Australia.</b>         | 58 children with<br>a mean age of<br>14.48 years. |        |            |       |              |
| Parent report<br>(n/N)                    |                                                   |        |            |       |              |
| Parent report<br>(mean, SD)               |                                                   |        | 16.7± 7.99 |       | 82.53± 17.61 |
| Child report<br>(n/N)                     |                                                   |        |            | 16/58 |              |
| Child report<br>(mean, SD)                | 4.3± 2.98                                         |        |            |       | 82.53± 17.61 |



|                                         |                                                    |
|-----------------------------------------|----------------------------------------------------|
| Control (n/N, %)                        |                                                    |
| <b>Mathias, 2016.</b><br><b>Brazil.</b> | 71 children<br>whose mean age<br>was not reported. |
| Parent report<br>(n/N)                  |                                                    |
| Parent report<br>(mean, SD)             | 11.2± 3.3                                          |
| Child report<br>(n/N)                   |                                                    |
| Child report<br>(mean, SD)              |                                                    |
| Control (n/N, %)                        |                                                    |
| <b>Randomized Control Trial</b>         |                                                    |
| <b>Wang, 2015.</b><br><b>China.</b>     | 82 children<br>whose mean age<br>was 2.11 years.   |
| Parent report<br>(n/N)                  |                                                    |
| Parent report<br>(mean, SD)             |                                                    |
| Child report<br>(n/N)                   |                                                    |
| Child report<br>(mean, SD)              |                                                    |

<sup>a</sup>n is the sample size who experienced complication; N is the total number of patients

<sup>b</sup>Grey shading represents no relevant data captured in the study for that outcome

<sup>c</sup>LAARP patients were compared with historical controls treated with PSARP between 1996 and 2000.
